# Supplementary material for: New technique for high-precision, simultaneous measurements of CH 4 , N 2 O and CO 2 concentrations; isotopic and elemental ratios of N 2 , O 2 and Ar; and total air content in ice cores by wet extraction
Source: Copernicus journal article supplement (doi:10.5194/amt-13-6703-2020), 2020-12-15
Supplement: Supplementary file 1 [file amt-13-6703-2020-supplement.zip]

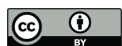

## *Supplement of*

# **New technique for high-precision, simultaneous measurements of CH<sub>4</sub>, N<sub>2</sub>O and CO<sub>2</sub> concentrations; isotopic and elemental ratios of N<sub>2</sub>, O<sub>2</sub> and Ar; and total air content in ice cores by wet extraction**

**Ikumi Oyabu et al.**

*Correspondence to:* Ikumi Oyabu (oyabu.ikumi@nipr.ac.jp), and Kenji Kawamura (kawamura@nipr.ac.jp)

- amt-13-6703-2020-supplement-title-page.pdf
- Oyabu et al.\_Dome Fuji and NEEM ice cores gas data.xlsx

The copyright of individual parts of the supplement might differ from the CC BY 4.0 License.
